# Supplementary material
Source: PubMed Central journal article supplement (PMC4416869)
Supplement: supp_M114.635631_jbc.M114.635631-1.pdf [file supp_M114.635631_jbc.M114.635631-1.pdf]

### Supplemental material to:

The predominant molecular state of bound enzyme determines the strength and type of product inhibition in the hydrolysis of recalcitrant polysaccharides by processive enzymes.

Silja Kuusk, Morten Sørli and Priit Väljamäe

*Equation S1 – Steady-state distribution of enzyme between different complexes for Scheme in Figure 6A*

Definition of rate constants is given in Figure 6A of the main article.

First order rate constants are in units of  $s^{-1}$ . Second order rate constants  $k_1$  and  $k_2$  are in units of  $(ml\ (mg^{-1}\ s^{-1}))$  whereas  $k_3$  and  $k_4$  are in units of  $(M^{-1}\ s^{-1})$ .

$[S]$  – concentration of substrate ( $mg\ ml^{-1}$ )

$[I]$  – concentration of inhibitor (M)

$[E_0]$  – total concentration of enzyme

$$E = k_{-1}k_{-3}k_{-4}k_{-5} + k_{-1}k_{-3}k_{-4}k_6 + k_{-1}k_{-3}k_{-5}k_{-2} + k_{-1}k_{-3}k_{-2}k_6 + k_{-1}k_{-4}k_{-5}k_2[S] + k_{-1}k_{-4}k_6k_2[S] + k_{-3}k_{-2}k_{-5}k_4[I] + k_{-3}k_{-2}k_6k_4[I] + k_{-3}k_{-2}k_6k_5$$

$$E^*S = k_{-3}k_{-4}k_{-5}k_1[S] + k_6k_{-4}k_{-3}k_1[S] + k_{-2}k_{-5}k_{-3}k_1[S] + k_6k_{-3}k_{-2}k_1[S] + k_1[S]k_{-4}k_{-5}k_2[S] + k_1[S]k_{-4}k_6k_2[S] + k_{-4}k_{-5}k_2[S]k_3[I] + k_{-4}k_2[S]k_6k_3[I]$$

$$EI = k_{-5}k_{-1}k_{-4}k_3[I] + k_6k_{-1}k_{-4}k_3[I] + k_{-5}k_{-2}k_{-1}k_3[I] + k_6k_{-2}k_{-1}k_3[I] + k_{-2}k_4[I]k_1[S]k_{-5} + k_{-2}k_4[I]k_6k_1[S] + k_{-2}k_6k_5k_1[S] + k_3[I]k_{-2}k_{-5}k_4[I] + k_3[I]k_{-2}k_6k_4[I] + k_5k_{-2}k_6k_3[I]$$

$$E^*SI = k_4[I]k_1[S]k_{-5}k_{-3} + k_4[I]k_6k_1[S]k_{-3} + k_2[S]k_3[I]k_{-1}k_{-5} + k_6k_5k_1[S]k_{-3} + k_2[S]k_6k_3[I]k_{-1} + k_4[I]k_2[S]k_1[S]k_{-5} + k_4[I]k_2[S]k_6k_1[S] + k_2[S]k_6k_5k_1[S] + k_4[I]k_2[S]k_{-5}k_3[I] + k_4[I]k_2[S]k_6k_3[I] + k_2[S]k_6k_3[I]k_5$$

$$ES = k_5k_1[S]k_{-4}k_{-3} + k_5k_1[S]k_{-3}k_{-2} + k_5k_1[S]k_{-4}k_2[S] + k_5k_{-4}k_2[S]k_3[I]$$

$$E_0 = E + E^*S + EI + E^*SI + ES$$

Fractions of enzyme in different forms:

$$F(E) = E/E_0;$$

$$F(E^*S) = E^*S/E_0;$$

$$F(EI) = EI/E_0;$$

$$F(E^*SI) = E^*SI/E_0;$$

$$F(ES) = ES/E_0;$$

*Equation S2 – Steady-state distribution of enzyme between different complexes for Scheme in Figure 6B*

Definition of rate constants is given in Figure 6B of the main article.

First order rate constants are in units of  $s^{-1}$ . Second order rate constants  $k_1$ ,  $k_2$ , and  $k_8$  are in units of  $(ml (mg^{-1} s^{-1}))$  whereas  $k_3$  and  $k_4$  are in units of  $(M^{-1} s^{-1})$ .

$[S]$  – concentration of substrate ( $mg ml^{-1}$ )

$[I]$  – concentration of inhibitor (M)

$[E_0]$  – total concentration of enzyme

$$E = k_{-1}k_{-3}k_{-8}k_{-4}k_{-5} + k_{-1}k_{-3}k_{-8}k_{-4}k_6 + k_{-1}k_{-3}k_{-8}k_{-5}k_{-2} + k_{-1}k_{-3}k_{-8}k_{-2}k_6 + k_{-1}k_{-8}k_{-4}k_{-5}k_2[S] + k_{-1}k_{-8}k_{-4}k_2[S]k_6 + k_{-3}k_{-8}k_7k_{-4}k_{-5} + k_{-3}k_{-8}k_{-2}k_4[I]k_{-5} + k_{-3}k_{-8}k_7k_{-4}k_6 + k_{-3}k_{-8}k_{-2}k_4[I]k_6 + k_{-3}k_{-8}k_{-2}k_7k_{-5} + k_{-3}k_{-8}k_{-2}k_6k_5 + k_{-3}k_{-8}k_{-2}k_7k_6 + k_{-8}k_7k_{-4}k_{-5}k_2[S] + k_{-8}k_7k_{-4}k_2[S]k_6$$

$$E^*S = k_1[S]k_{-4}k_{-5}k_{-3}k_{-8} + k_1[S]k_{-4}k_{-3}k_{-8}k_6 + k_1[S]k_{-5}k_{-3}k_{-8}k_{-2} + k_1[S]k_{-3}k_{-8}k_{-2}k_6 + k_1[S]k_{-4}k_{-5}k_{-8}k_2[S] + k_1[S]k_{-4}k_{-8}k_2[S]k_6 + k_{-4}k_{-5}k_2[S]k_3[I]k_{-8} + k_{-4}k_2[S]k_6k_3[I]k_{-8}$$

$$EI = k_3[I]k_{-1}k_{-8}k_{-4}k_{-5} + k_3[I]k_{-1}k_{-8}k_{-4}k_6 + k_3[I]k_{-2}k_{-1}k_{-8}k_{-5} + k_3[I]k_{-2}k_{-1}k_{-8}k_6 + k_{-2}k_4[I]k_1[S]k_{-5}k_{-8} +$$

$$+ k_{-2}k_4[I]k_6k_1[S]k_{-8} + k_{-2}k_6k_5k_1[S]k_{-8} + k_3[I]k_{-8}k_7k_{-4}k_{-5} + k_3[I]k_{-2}k_{-8}k_4[I]k_{-5} + k_3[I]k_{-8}k_7k_{-4}k_6 +$$

$$+ k_3[I]k_{-2}k_{-8}k_4[I]k_6 + k_3[I]k_{-2}k_{-8}k_7k_{-5} + k_3[I]k_{-2}k_{-8}k_6k_5 + k_3[I]k_{-2}k_{-8}k_6k_7$$

$$E * SI = k_4[I]k_1[S]k_{-5}k_{-3}k_{-8} + k_4[I]k_6k_1[S]k_{-3}k_{-8} + k_2[S]k_3[I]k_{-1}k_{-8}k_{-5} + k_6k_5k_1[S]k_{-3}k_{-8} +$$

$$+ k_2[S]k_6k_3[I]k_{-1}k_{-8} + k_4[I]k_2[S]k_1[S]k_{-5}k_{-8} + k_4[I]k_2[S]k_6k_1[S]k_{-8} + k_2[S]k_6k_5k_1[S]k_{-8} +$$

$$+ k_4[I]k_2[S]k_{-5}k_3[I]k_{-8} + k_4[I]k_2[S]k_6k_3[I]k_{-8} + k_2[S]k_3[I]k_{-8}k_7k_{-5} + k_2[S]k_6k_3[I]k_5k_{-8} +$$

$$+ k_2[S]k_6k_3[I]k_{-8}k_7$$

$$ES = k_5k_1[S]k_{-4}k_{-3}k_{-8} + k_5k_1[S]k_{-3}k_{-8}k_{-2} + k_5k_1[S]k_{-4}k_{-8}k_2[S] + k_5k_{-4}k_2[S]k_3[I]k_{-8}$$

$$E * ST = k_8[S]k_{-1}k_{-3}k_{-4}k_{-5} + k_8[S]k_{-1}k_{-3}k_{-4}k_6 + k_8[S]k_{-1}k_{-3}k_{-5}k_{-2} + k_8[S]k_{-1}k_{-3}k_{-2}k_6 + k_7k_1[S]k_{-4}k_{-5}k_{-3} +$$

$$+ k_7k_1[S]k_{-4}k_{-3}k_6 + k_7k_1[S]k_{-5}k_{-3}k_{-2} + k_7k_1[S]k_{-3}k_{-2}k_6 + k_8[S]k_{-1}k_{-4}k_{-5}k_2[S] + k_8[S]k_{-1}k_{-4}k_2[S]k_6 +$$

$$+ k_7k_1[S]k_{-4}k_{-5}k_2[S] + k_7k_1[S]k_{-4}k_2[S]k_6 + k_8[S]k_7k_{-3}k_{-4}k_{-5} + k_8[S]k_{-3}k_{-2}k_4[I]k_{-5} + k_8[S]k_7k_{-3}k_{-4}k_6 +$$

$$+ k_8[S]k_{-3}k_{-2}k_4[I]k_6 + k_8[S]k_7k_{-3}k_{-5}k_{-2} + k_8[S]k_{-3}k_{-2}k_6k_5 + k_8[S]k_7k_{-3}k_{-2}k_6 + k_7k_{-4}k_{-5}k_2[S]k_3[I] +$$

$$+ k_7k_{-4}k_2[S]k_6k_3[I] + k_8[S]k_7k_{-4}k_{-5}k_2[S] + k_8[S]k_7k_{-4}k_2[S]k_6$$

$$E_0 = E + E * S + EI + E * SI + ES + E * ST$$

Fractions of enzyme in different forms:

$$F(E) = E/E_0;$$

$$F(E * S) = E * S/E_0;$$

$$F(EI) = EI/E_0;$$

$$F(E * SI) = E * SI/E_0;$$

$$F(ES) = ES/E_0;$$

$$F(E * ST) = E * ST/E_0;$$
